# Supplementary material for: In Vitro Cytotoxicity and In Vivo Antitumor Activity of Lipid Nanocapsules Loaded with Novel Pyridine Derivatives
Source: MDPI journal article supplement (doi:10.3390/pharmaceutics15061755), 2023-06-16
Supplement: s1 [file s1]

# Supplementary Materials: *In vitro* cytotoxicity and *In vivo* anti-tumor activity of Lipid Nanocapsules Loaded with Novel Pyridine Derivatives

Amr Selim Abu Lila, Mohammed Amran, Mohamed A. Tantawy, Ehssan H. Moglad, Shadeed Gad, Hadil Faris Alotaibi, Ahmad J. Obaidullah, El-Sayed Khafagy

## Supplementary Information:

**Table S1.** Maximum wavelength ( $\lambda_{\max}$ ) of various pyridine derivative (S1–S4) in acetonitrile, methanol, ethanol, phosphate buffer (pH 7.4), and ethanol:phosphate buffer (1:1).

| Solvent                        | S1                                            |        | S2     |        | S3     |        | S4     |        |
|--------------------------------|-----------------------------------------------|--------|--------|--------|--------|--------|--------|--------|
|                                | Maximum wavelength ( $\lambda_{\max}$ ) in nm |        |        |        |        |        |        |        |
|                                | Band 1                                        | Band 2 | Band 1 | Band 2 | Band 1 | Band 2 | Band 1 | Band 2 |
| Acetonitrile                   | 263                                           | 323    | 297    | 338    | 258    | 326    | 244    | 335    |
| Methanol                       | 231                                           | 330    | 244    | 345    | 270    | 334    | 276    | 330    |
| Ethanol                        | 274                                           | 326    | 237    | 340    | 274    | 329    | 254    | 328    |
| Phosphate buffer (pH 7.4)      | 273                                           | 323    | 232    | 338    | 263    | 327    | 261    | 326    |
| Ethanol:Phosphate buffer (1:1) | 273                                           | 325    | 238    | 339    | 274    | 329    | 254    | 331    |

**Table S2.** Solubility of different pyridine derivatives (S1–S4) in different solvents.

| Compound | solubility (mg/ml) |              |              |               |
|----------|--------------------|--------------|--------------|---------------|
|          | ethanol            | PB (pH 7.4)  | water        | methanol      |
| S1       | 5.98 ± 0.230       | 8.07 ± 0.065 | 0.57 ± 0.021 | 21.76 ± 0.260 |
| S2       | 13.82 ± 0.326      | 1.63 ± 0.005 | 1.25 ± 0.006 | 25.71 ± 0.323 |
| S3       | 18.86 ± 0.225      | 0.59 ± 0.010 | 0.99 ± 0.007 | 35.36 ± 0.203 |
| S4       | 18.56 ± 0.337      | 0.59 ± 0.001 | 0.58 ± 0.002 | 16.57 ± 0.315 |

**Table S3.** Results of the lethal doses of compound (S4) for the determination of the LD50 after i.p injection in female Albino Swiss mice (n=5).

| Groups | Dose mg/kg | Number of animal dead | Dose difference (a) | Mean mortality (b) | Probit (a*b) |
|--------|------------|-----------------------|---------------------|--------------------|--------------|
| 1      | Control    | 0                     | -                   | -                  | -            |
| 2      | 100        | 0                     | 0                   | -                  | -            |
| 3      | 120        | 5                     | 20                  | 2.5                | 50           |
| 4      | 140        | 5                     | 20                  | 5                  | 100          |
| 5      | 160        | 5                     | 20                  | 5                  | 100          |
| 6      | 180        | 5                     | 20                  | 5                  | 100          |

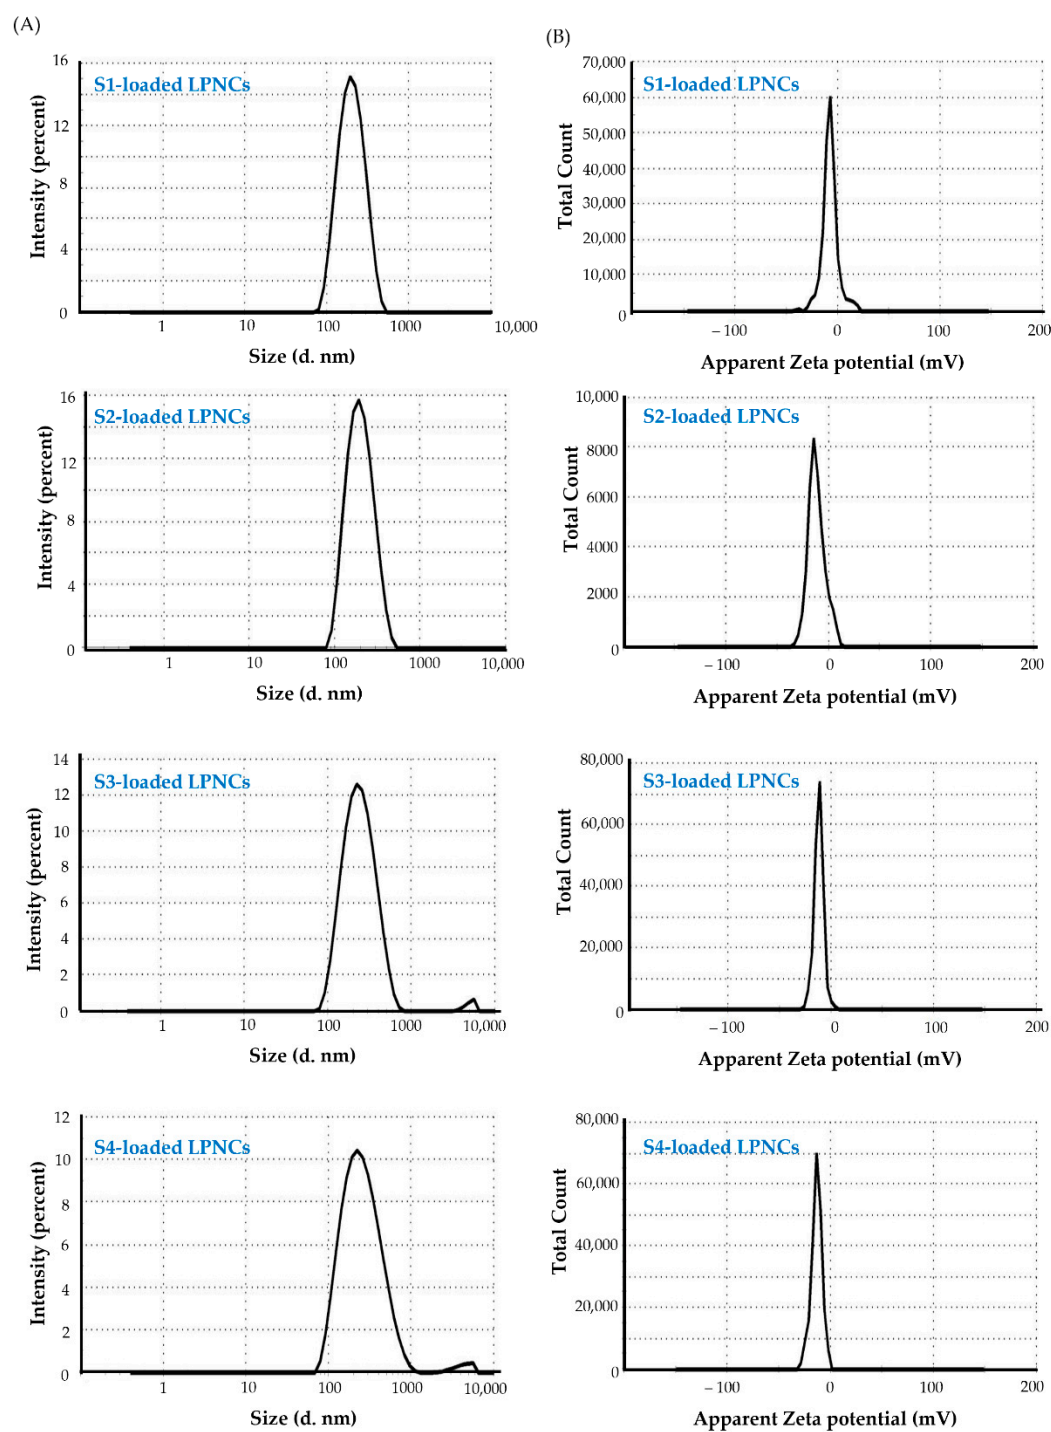

**Figure S1.** (A) Particle size and (B) zeta potential of various test compound-loaded LPNCs.

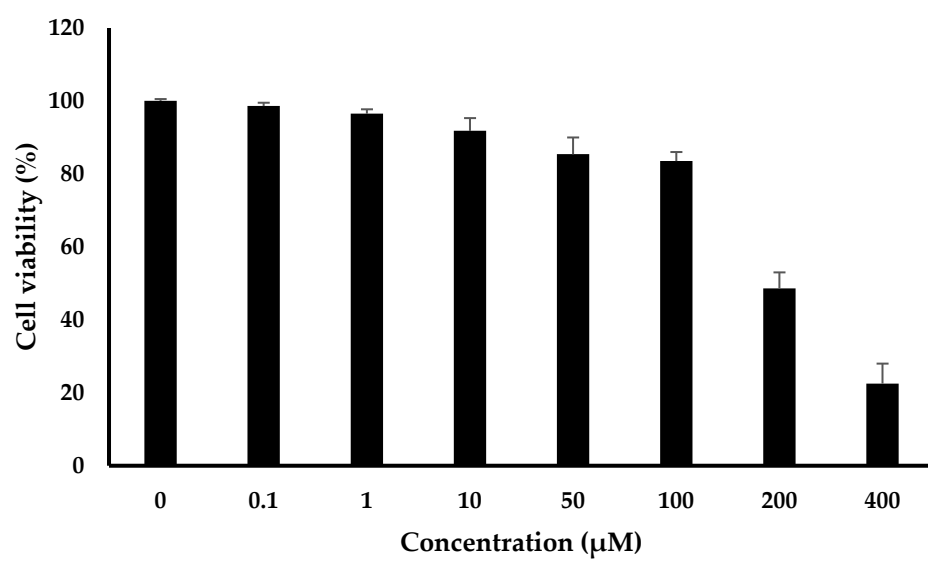

**Figure S2.** *In vitro* cytotoxicity of S4-loaded LPNCs against normal noncancerous MCF-10A breast cancer cells.
